# Supplementary material for: Antigenic drift and subtype interference shape A(H3N2) epidemic dynamics in the United States
Source: PubMed Central journal article supplement (PMC10593063; doi:10.1101/2023.10.02.23296453), 2023-10-03
Supplement: NIHPP2023.10.02.23296453v1-supplement-3.pdf [file NIHPP2023.10.02.23296453v1-supplement-3.pdf]

914  
915 **Supplementary Methods**

916 **Influenza virological surveillance data**

917 Data on weekly influenza type and subtype circulation were obtained from the US CDC's World Health  
918 Organization (WHO) Collaborating Center for Surveillance, Epidemiology and Control of Influenza [121].  
919 Approximately 100 public health laboratories and 300 clinical laboratories located throughout the United  
920 States report influenza test results to the US CDC, through either the US WHO Collaborating  
921 Laboratories Systems or the National Respiratory and Enteric Virus Surveillance System (NREVSS).  
922 Clinical laboratories test respiratory specimens for diagnostic purposes whereas public health laboratories  
923 primarily test specimens to characterize influenza virus type, subtype, and lineage circulation. Public  
924 health laboratories often receive samples that have already tested positive for influenza at a clinical  
925 laboratory.

926 We estimated the weekly number of respiratory samples testing positive for influenza A(H1N1), A(H3N2),  
927 or B at the HHS region level. Beginning in the 2015/2016 season, reports from public health and clinical  
928 laboratories are presented separately in the CDC's weekly influenza updates. From 2015 week 40  
929 onwards, we used clinical laboratory data to estimate the proportion of respiratory samples testing  
930 positive for any influenza type/subtype and the proportion of samples testing positive for influenza A or B.  
931 We used public health laboratory data to estimate the proportion of influenza A isolates typed as A(H3N2)  
932 or A(H1N1)pdm09 in each week. Untyped influenza A-positive isolates were assigned to either A(H3N2)  
933 or A(H1N1) according to their proportions among typed isolates. We combined seasonal and pandemic  
934 A(H1N1) as seasonal A(H1N1) influenza and the Victoria and Yamagata lineages of influenza B as  
935 influenza B. We defined influenza A subtype dominance in each season based on the proportion of  
936 influenza A positive samples typed as A(H1N1) or A(H3N2).

937 **A(H3N2) epidemiological model**

938 Prior to  $R_t$  estimation, we computed daily case counts by disaggregating weekly A(H3N2) incidence rates  
939 to daily rates (tempdisagg package) [183] and rounding the resultant values to integers. Observed cases  
940 were modelled as a function of latent infections in the population, assuming a negative binomial  
941 distribution. We assumed an infection ascertainment rate of 0.45 [184], a lognormal-distributed infection-  
942 to-symptom-onset time period with mean 1.4 days and standard deviation 1.5 days [185], and a  
943 lognormal-distributed onset-to-case-observation time period with mean 2 days and standard deviation 1.5  
944 days [186]. Thus, the time distribution for infection-to-case-observation was

945 
$$\pi \sim \text{lognormal}(1.4, 1.5) + \text{lognormal}(2, 1.5)$$

946 Instead of using the renewal equation to propagate infections, we treated infections as latent parameters  
947 in the model, because the additional variance around infections leads to a posterior distribution that is  
948 easier to sample [125]. For the generation time, we assumed a discretized Weibull distribution with mean  
949 3.6 days and standard deviation 1.6 days [187]. To control for temporal autocorrelation, we modelled  $R_t$   
950 as a daily random walk. We assigned the intercept a normal prior with mean  $\log 2$  and variance 0.2, which  
951 gives the initial reproduction number  $R_0$  a prior mean of approximately 2.

952 Epidemic trajectories for each region and season were fit independently using Stan's Hamiltonian Monte  
953 Carlo sampler [188]. For each model, we ran 4 chains, each for 10,000 iterations (including a burn-in  
954 period of 2,000 iterations that was discarded), producing a total posterior sample size of 32,000. We  
955 verified convergence by confirming that all parameters had sufficiently low  $\hat{R}$  values (all  $\hat{R} < 1.1$ )  
956 and sufficiently large effective sample sizes (>15% of the total sample size).

957 **Wavelet analysis**

958 We applied a wavelet approach to quantify the relative timing of influenza A(H3N2), A(H1N1), and B  
959 epidemics in each HHS region. Incidence time series were square root transformed and normalized and  
960 then padded with zeros to reduce edge effects. Wavelet coherence was used to determine the degree of  
961 synchrony between A(H3N2) versus A(H1N1) incidence and A(H3N2) versus B incidence within each  
962 region at multi-year time scales. Statistical significance was assessed using 10,000 Monte Carlo  
963 simulations. Coherence measures time- and frequency-specific associations between two wavelet  
964 transforms, with high coherence indicating that two non-stationary signals (time series) are associated at  
965 a particular time and frequency [82].

966 Following methodology developed for influenza and other viruses [19,82,189-191], we used continuous  
967 wavelet transformations (Morlet) to calculate the phase of seasonal A(H3N2), A(H1N1), and B epidemics.  
968 We reconstructed weekly time series of phase angles using wavelet reconstruction [19,192] and extracted  
969 the major one-year seasonal component (period 0.8 to 1.2 years) of the Morlet decomposition of  
970 A(H3N2), A(H1N1), and B time series. To estimate the relative timing of A(H3N2) and A(H1N1) incidence  
971 or A(H3N2) and B incidence in each region, phase angle differences were calculated as phase in  
972 A(H3N2) minus phase in A(H1N1) (or B), with a positive value indicating that A(H1N1) (or B) lags  
973 A(H3N2).

1537

## Supplementary Figures

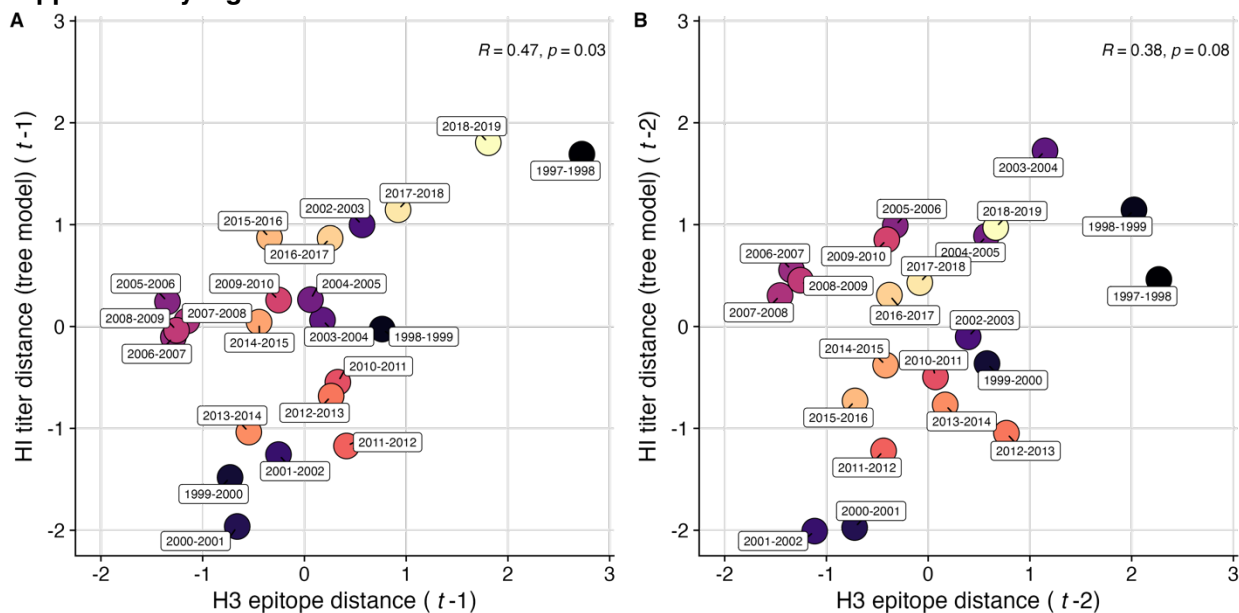

1538

1539 **Figure S1. Comparison of seasonal antigenic drift measured by substitutions at hemagglutinin**  
1540 **(H3) epitope sites and HI titer measurements, from 1997-1998 to 2018-2019.** We used Spearman  
1541 correlation tests to measure associations between H3 epitope distance and HI titer distance at **A.** one-  
1542 season lags and **B.** two-season lags. Seasonal antigenic distance is the mean distance between strains  
1543 circulating in season  $t$  and strains circulating in the prior season  $t-1$  year (one season lag) or two  
1544 seasons ago  $t-2$  years (two season lag). Seasonal distances are scaled because epitope distance and  
1545 HI titer distance use different units of measurement. Point labels indicate the current influenza season,  
1546 and point color denotes the relative timing of influenza seasons, with earlier seasons shaded dark purple  
1547 (e.g., 1997-1998) and later seasons shaded light yellow (e.g., 2018-2019). H3 epitope distance and HI  
1548 titer (tree model) distance at two-season lags capture expected “jumps” in antigenic drift during key  
1549 seasons previously associated with major antigenic transitions [32], such as the SY97 cluster seasons  
1550 (1997-1998, 1998-1999, 1999-2000) and the FU02 cluster season (2003-2004).

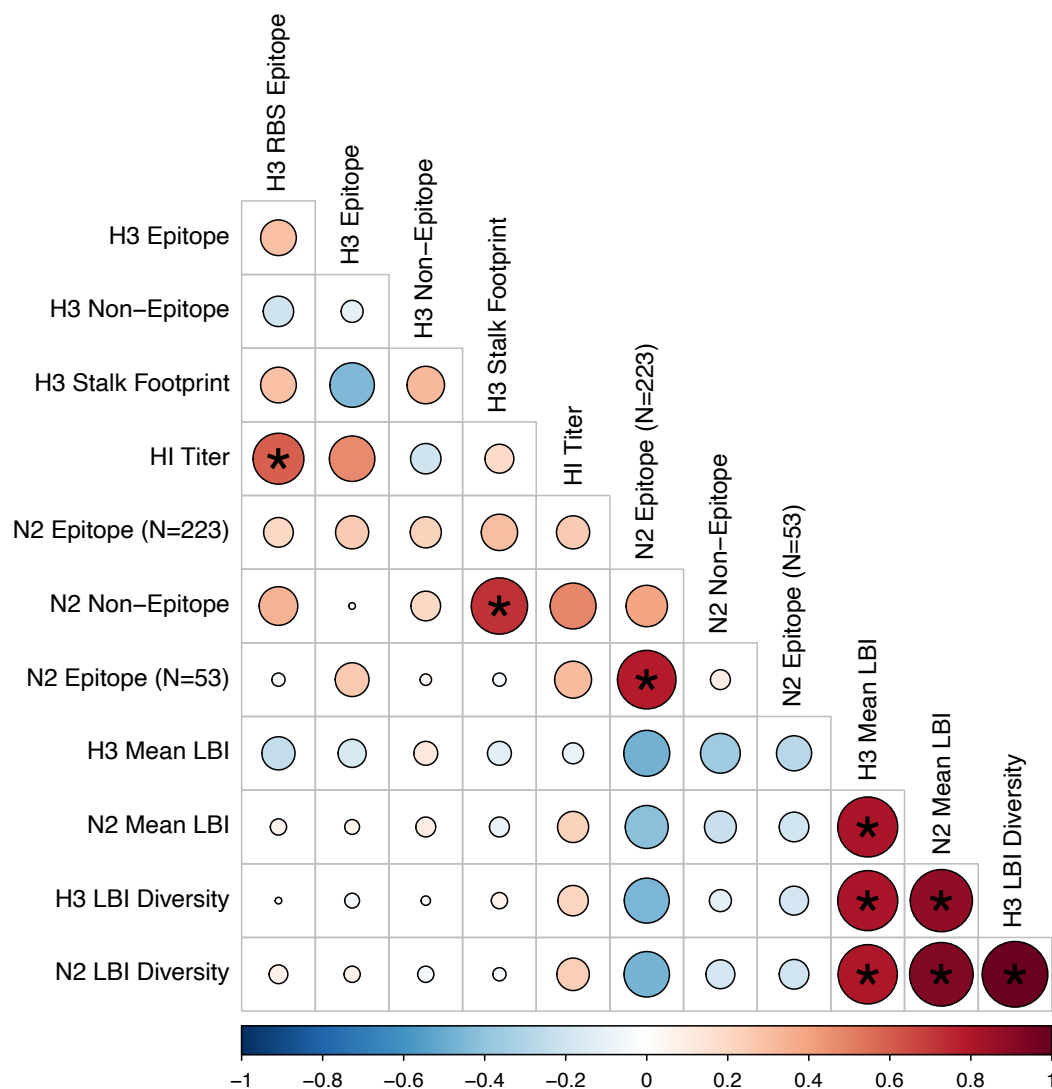

1551  
 1552 **Figure S2. Pairwise correlations between H3 and N2 evolutionary indicators (one season lags).** We  
 1553 measured Spearman's correlations between seasonal measures of H3 and N2 evolution, including H3  
 1554 RBS distance, H3 epitope distance, H3 non-epitope distance, H3 stalk footprint distance, HI titer distance,  
 1555 N2 epitope distance based on 223 or 53 epitope sites, N2 non-epitope distance, mean clade growth of H3  
 1556 and N2 (local branching index, LBI), and the Shannon entropy of H3 and N2 LBI values. Seasonal  
 1557 distances were estimated as the mean distance between strains circulating in the current season  $t$  and  
 1558 those circulating in the prior season ( $t-1$ ). The Benjamini and Hochberg method was used to adjust P-  
 1559 values for multiple testing. The color of each circle indicates the strength and direction of the association,  
 1560 from dark red (strong positive correlation) to dark blue (strong negative correlation). Stars within circles  
 1561 indicate statistical significance (adjusted  $P < 0.05$ ).

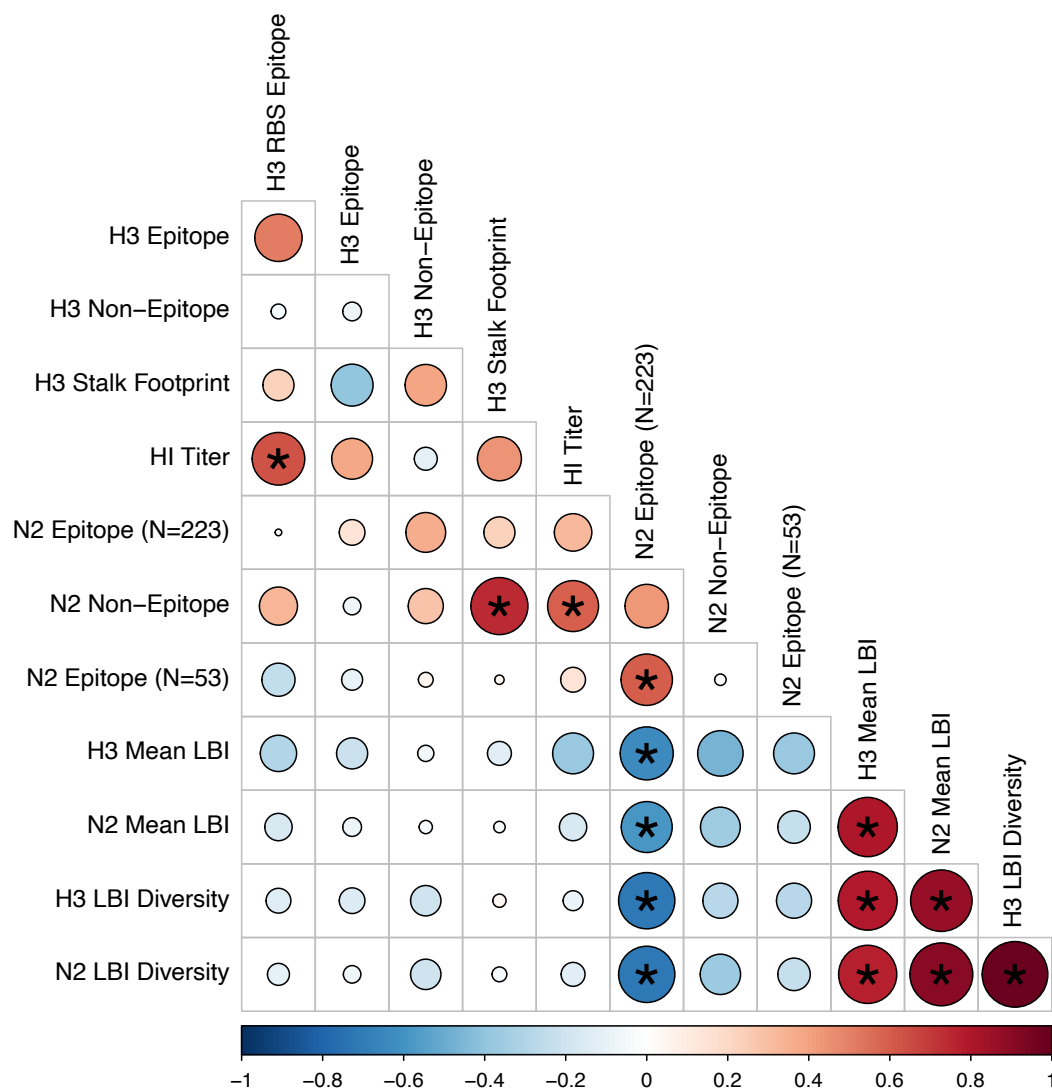

1562  
 1563 **Figure S3. Pairwise correlations between H3 and N2 evolutionary indicators (two season lags).** We  
 1564 measured Spearman's correlations between seasonal measures of H3 and N2 evolution, including H3  
 1565 RBS distance, H3 epitope distance, H3 non-epitope distance, H3 stalk footprint distance, HI titer distance  
 1566 (tree model), N2 epitope distance based on 223 or 53 epitope sites, N2 non-epitope distance, mean clade  
 1567 growth of H3 and N2 (local branching index, LBI), and the Shannon entropy of H3 and N2 LBI values.  
 1568 Seasonal distances were estimated as the mean distance between strains circulating in the current  
 1569 season  $t$  and those circulating in the prior season ( $t - 1$ ). The Benjamini and Hochberg method was used  
 1570 to adjust P-values for multiple testing. The color of each circle indicates the strength and direction of the  
 1571 association, from dark red (strong positive correlation) to dark blue (strong negative correlation). Stars  
 1572 within circles indicate statistical significance (adjusted  $P < 0.05$ ).

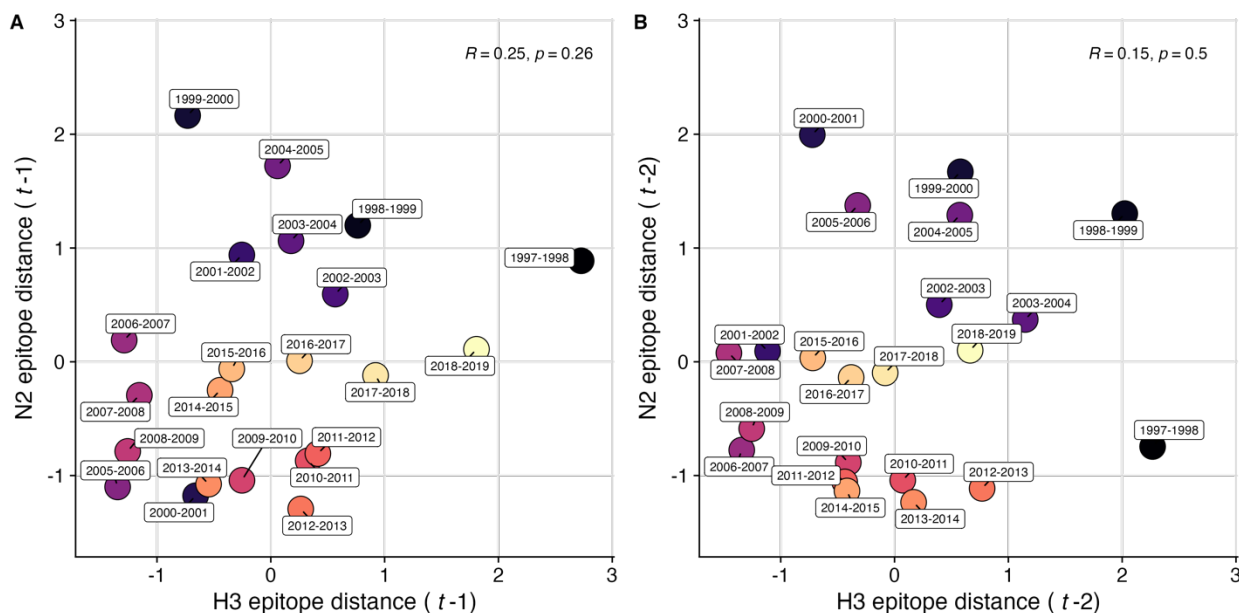

1573  
 1574 **Figure S4. Comparison of seasonal antigenic drift measured by substitutions at hemagglutinin**  
 1575 **(H3) and neuraminidase (N2) epitope sites, from 1997-1998 to 2018-2019.** We used Spearman  
 1576 correlation tests to measure associations between H3 epitope distance and N2 epitope distance at **A.**  
 1577 one-season lags and **B.** two-season lags. Seasonal epitope distance is the mean distance between  
 1578 strains circulating in season  $t$  and strains circulating in the prior season  $t - 1$  (one season lag) or two  
 1579 seasons ago  $t - 2$  (two season lag). Point labels indicate the current influenza season, and point color  
 1580 denotes the relative timing of influenza seasons, with earlier seasons shaded dark purple (e.g., 1997-  
 1581 1998) and later seasons shaded light yellow (e.g., 2018-2019). N2 epitope distance at one-season lags  
 1582 captures expected “jumps” in antigenic drift during key seasons previously associated with major  
 1583 antigenic transitions [32], such as the SY97 cluster seasons (1997-1998, 1998-1999, 1999-2000) the  
 1584 FU02 cluster season (2003-2004), and the CA04 cluster season (2004-2005).

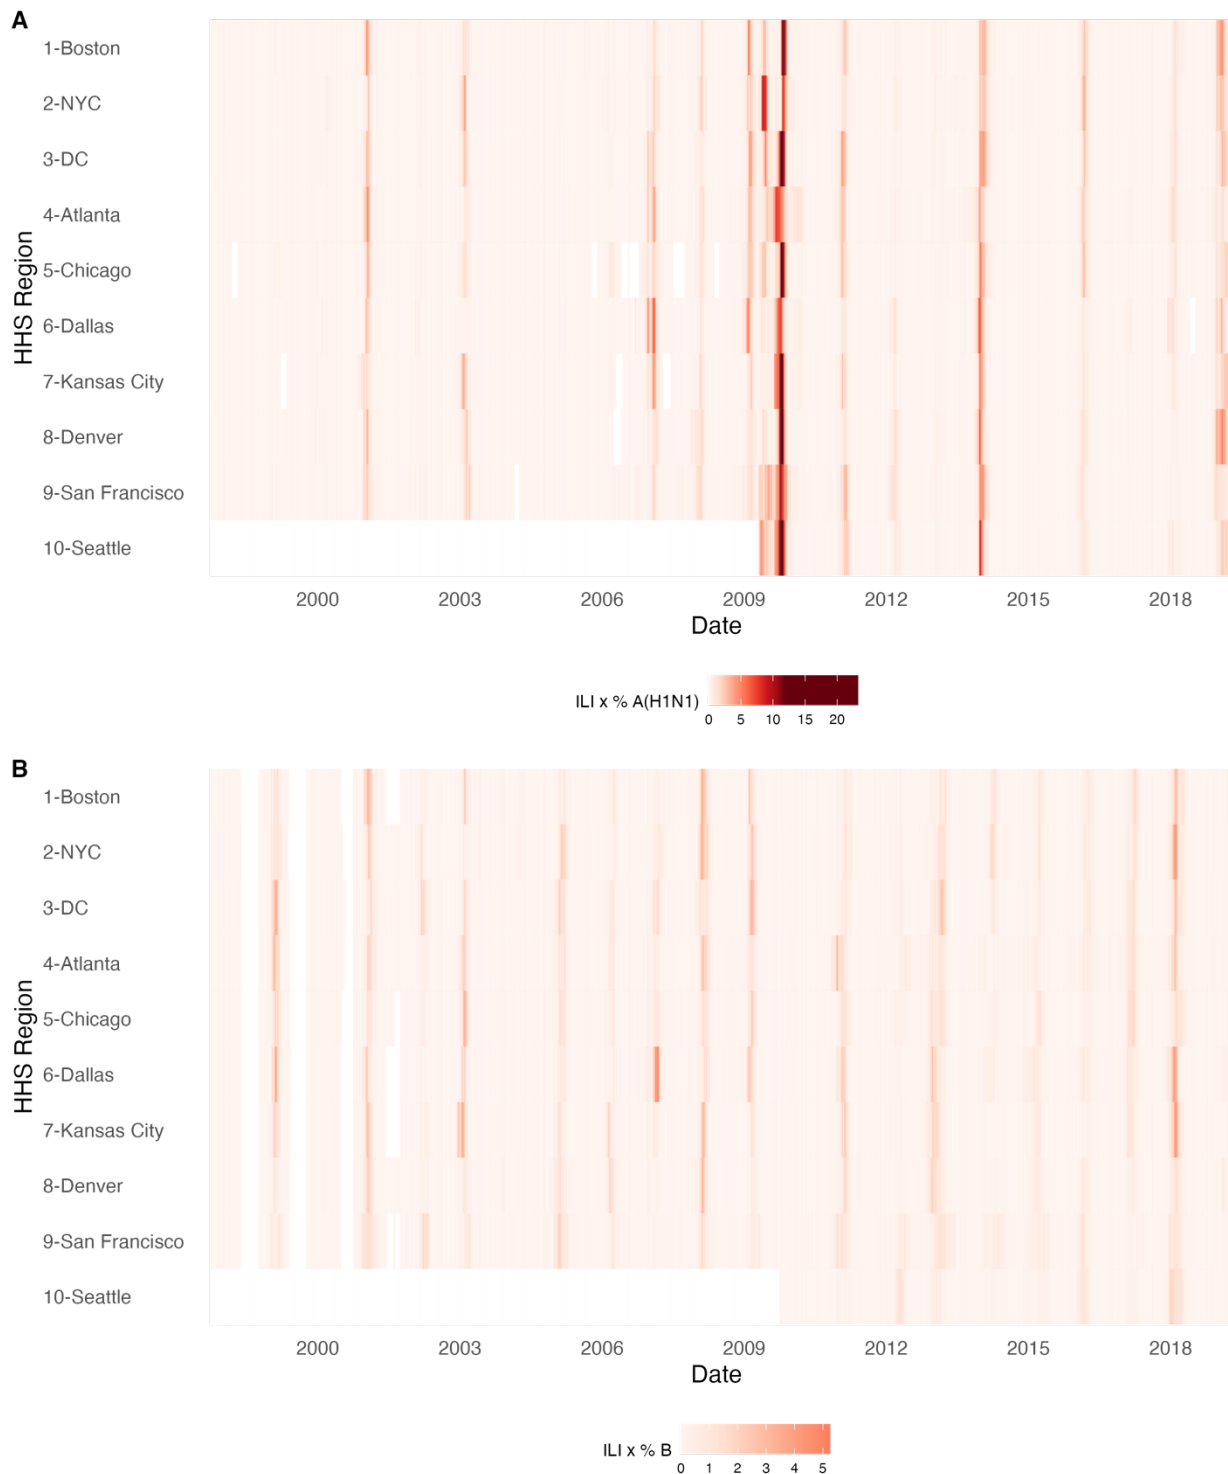

1585 **Figure S5. Intensity of weekly incidence of A. influenza A(H1N1) and B. influenza B in ten HHS**  
1586 **regions, 1997 - 2019.** Seasonal and pandemic A(H1N1) were combined as A(H1N1), and the Victoria  
1587 and Yamagata lineages of influenza B were combined as influenza B. White tiles indicate weeks when  
1588 either influenza-like-illness cases or virological data were not reported. Data for Region 10 were not  
1589 available in seasons prior to 2009.  
1590

1591

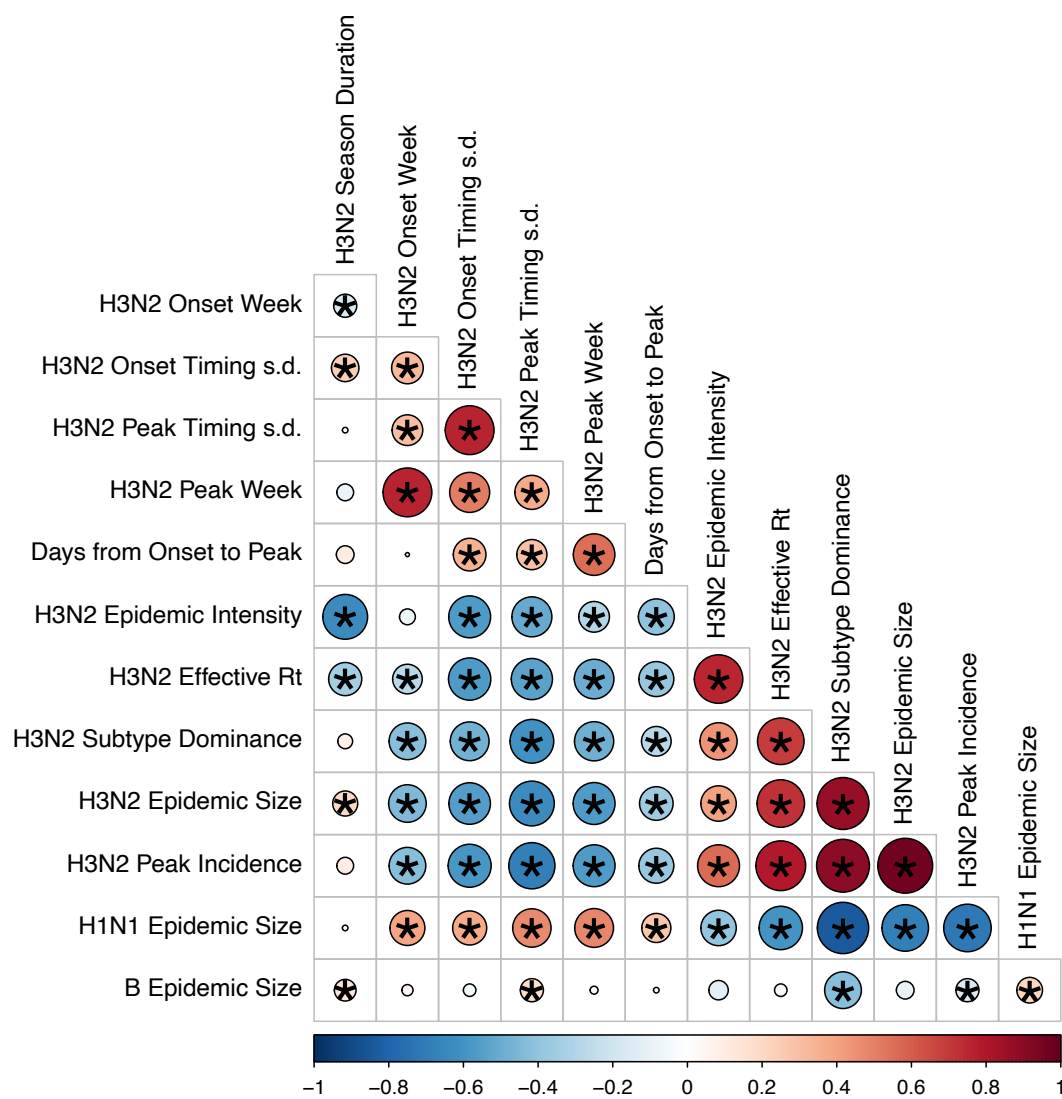

1592

1593 **Figure S6. Pairwise correlations between seasonal A(H3N2), A(H1N1), and B epidemic metrics.** We  
 1594 measured Spearman's correlations among indicators of A(H3N2) epidemic timing, including onset week,  
 1595 peak week, regional variation (s.d.) in onset and peak timing, and the number of days from onset to peak,  
 1596 indicators of A(H3N2) epidemic magnitude, including epidemic intensity (i.e., the "sharpness" of the  
 1597 epidemic curve), transmissibility (maximum effective reproduction number, Rt), subtype dominance  
 1598 patterns, epidemic size, and peak incidence. We also considered relationships between the circulation of  
 1599 other types/subtypes and A(H3N2) epidemic burden and timing. The Benjamini and Hochberg method  
 1600 was used to adjust P-values for multiple testing. The color of each circle indicates the strength and  
 1601 direction of the association, from dark red (strong positive correlation) to dark blue (strong negative  
 1602 correlation). Stars within circles indicate statistical significance (adjusted P < 0.05).



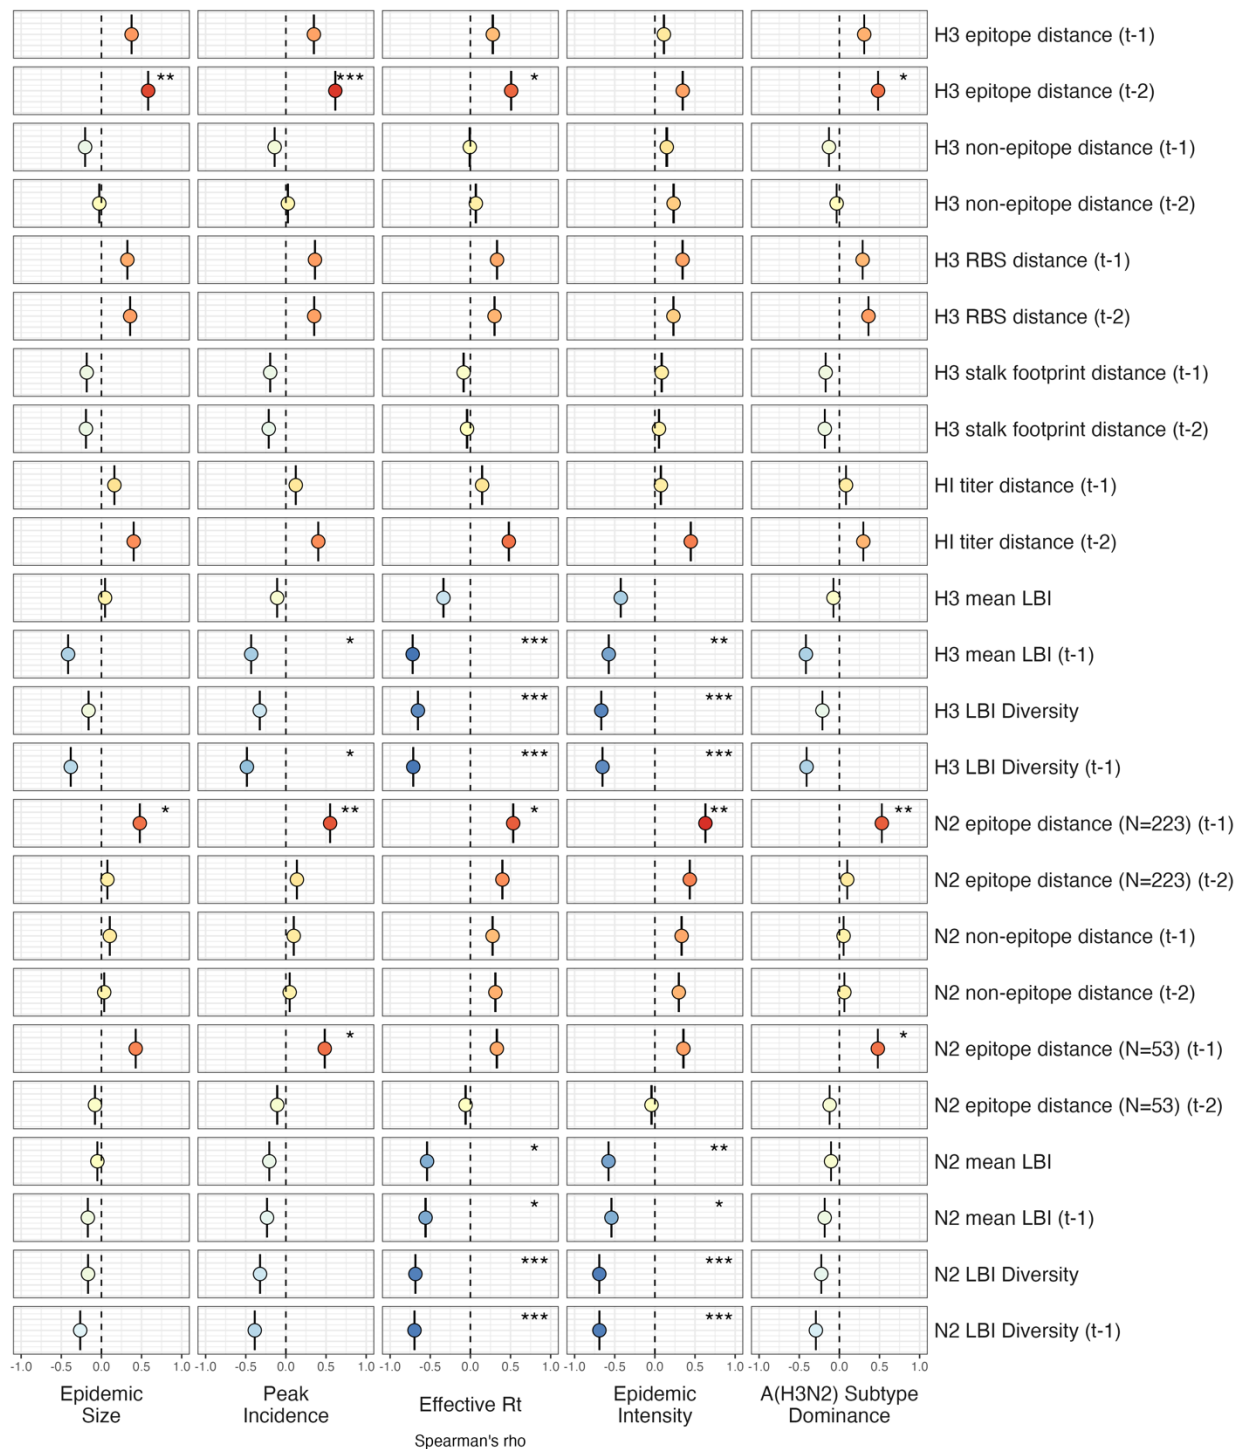

1603  
 1604 **Figure S7. Univariate correlations between A(H3N2) viral fitness and epidemic impact.** Mean  
 1605 Spearman correlation coefficients, 95% confidence intervals of correlation coefficients, and corresponding  
 1606 p-values of bootstrapped (N = 1000) viral fitness indicators (rows) and epidemic metrics (columns). Point  
 1607 color indicates the strength and direction of the association, from dark red (strong positive correlation) to  
 1608 dark blue (strong negative correlation), and stars indicate statistical significance (\* P < 0.05, \*\* P < 0.01,  
 1609 \*\*\* P < 0.001). Abbreviations: HI = hemagglutination inhibition, RBS: receptor binding site, t - 1 = one-  
 1610 season lag, t - 2 = two-season lag, LBI = local branching index.

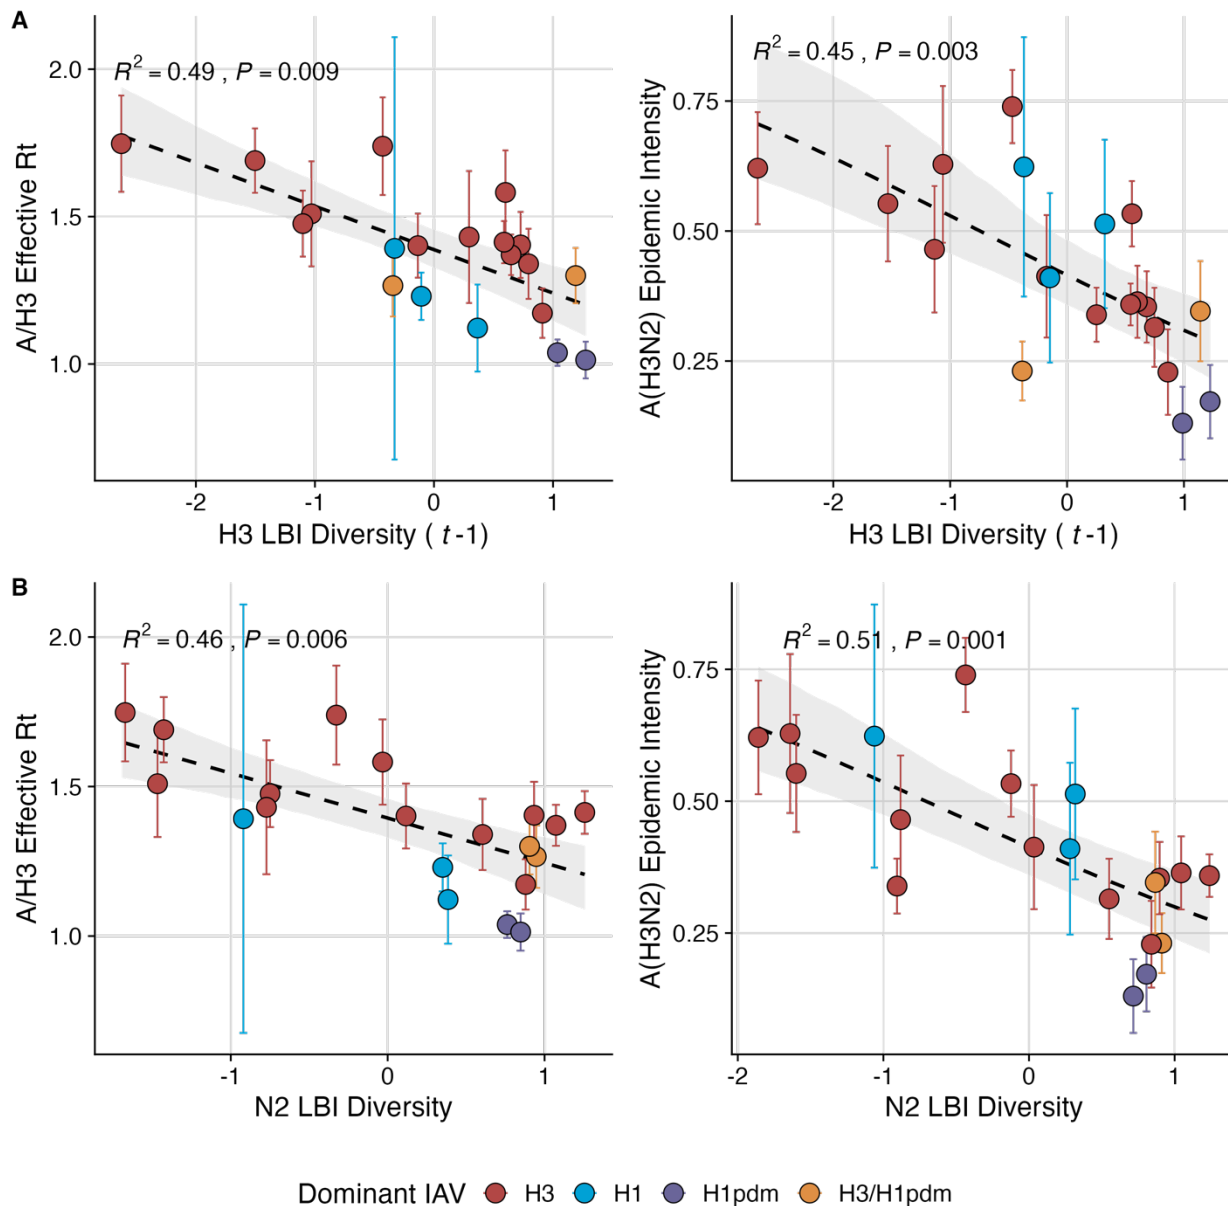

1611  
 1612 **Figure S8. Low diversity in the growth rates of circulating A(H3N2) clades is associated with more**  
 1613 **intense epidemics and higher transmissibility.** A(H3N2) effective Rt and epidemic intensity negatively  
 1614 correlate with the diversity of LBI values among circulating A(H3N2) lineages in the current or prior  
 1615 season, measured by the Shannon entropy of **A.** H3 local branching index (LBI) values in the prior  
 1616 season ( $t-1$ ), and **B.** the Shannon entropy of N2 LBI values in the current season  $t$ . LBI values are  
 1617 scaled to aid in direct comparisons of H3 and N2 LBI diversity. Point color indicates the dominant  
 1618 influenza A subtype based on CDC influenza season summary reports (red: A(H3N2), blue: A(H1N1),  
 1619 purple: A(H1N1)pdm09, orange: A(H3N2)/A(H1N1)pdm09 co-dominant), and vertical bands are 95%  
 1620 confidence intervals of regional estimates. Mean A(H3N2) epidemic metric values were fit as a function of  
 1621 seasonal LBI diversity using Gaussian GLMs (effective Rt: inverse link) or Beta GLMs (epidemic intensity:  
 1622 logit link) with 1000 bootstrap resamples.

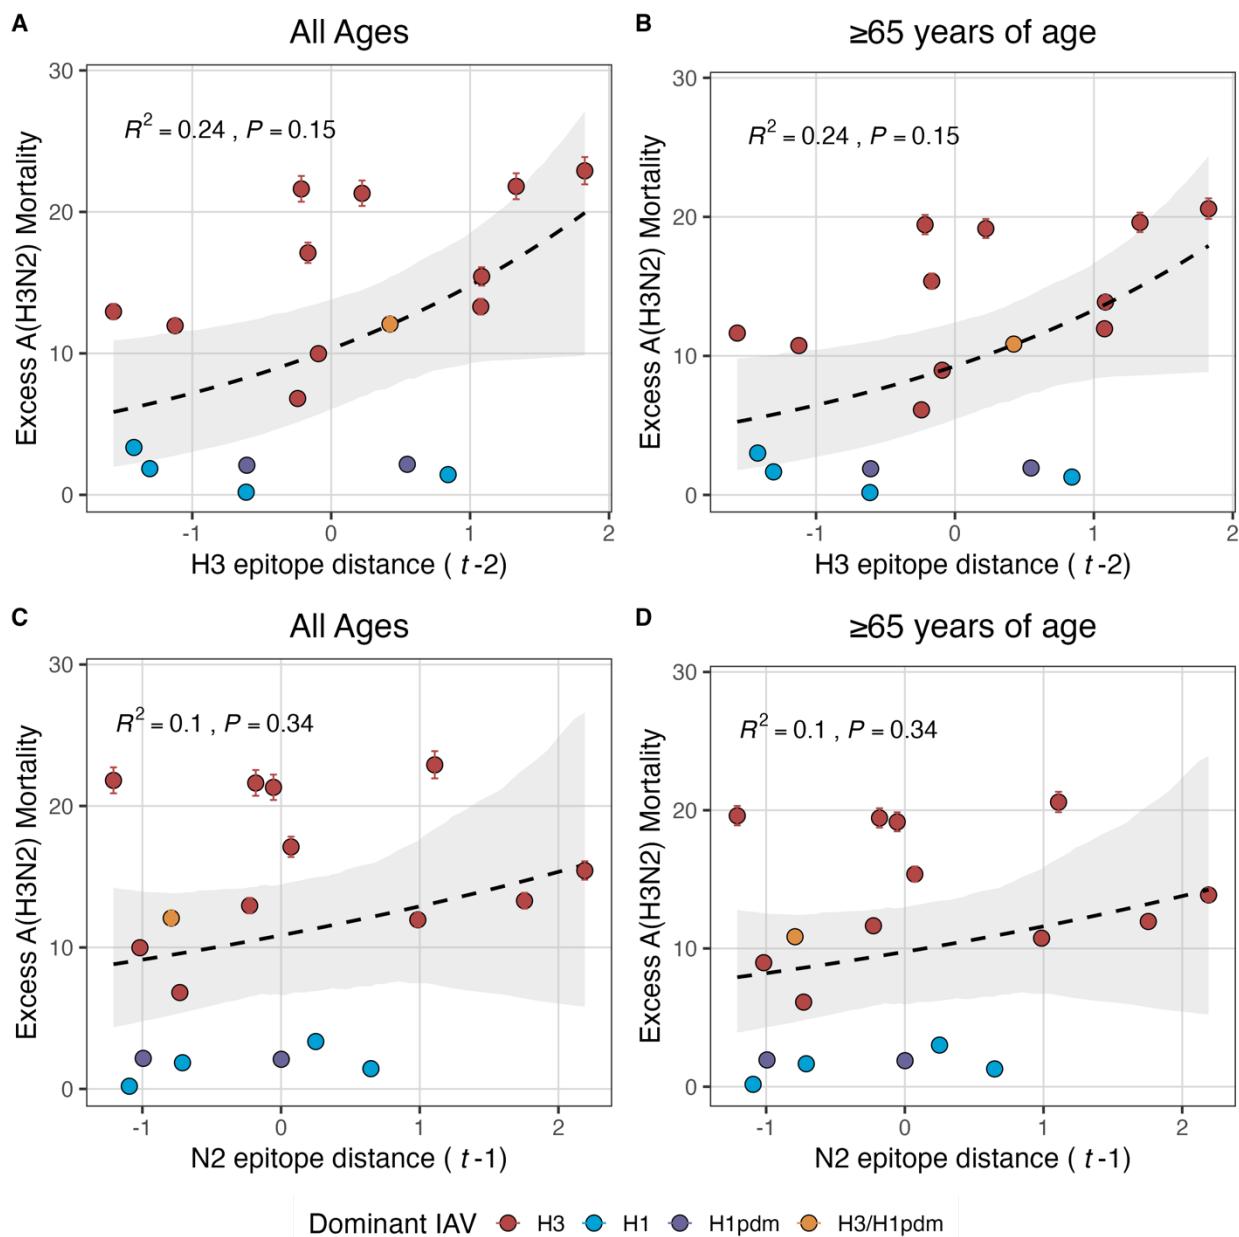

1623  
 1624 **Figure S9. Excess influenza A(H3N2) mortality increases with H3 and N2 antigenic drift, but**  
 1625 **correlations are not statistically significant.** The number of excess influenza deaths attributable to  
 1626 A(H3N2) (per 100,000 people) were estimated from a seasonal regression model fit to weekly pneumonia  
 1627 and influenza-coded deaths [127]. Seasonal epitope distance is the mean distance between strains  
 1628 circulating in season  $t$  and those circulating in the prior season ( $t-1$ ) or two seasons ago ( $t-2$ ).  
 1629 Distances are scaled to aid in direct comparison of evolutionary indicators. Point color indicates the  
 1630 dominant influenza A subtype based on CDC influenza season summary reports (red: A(H3N2), blue:  
 1631 A(H1N1), purple: A(H1N1)pdm09, orange: A(H3N2)/A(H1N1)pdm09 co-dominant), and vertical bars are  
 1632 95% confidence intervals of excess mortality estimates. National excess mortality estimates were fit as a  
 1633 function of seasonal H3 or N2 epitope distance using Gaussian GLMs (log link) with 1000 bootstrap  
 1634 resamples.

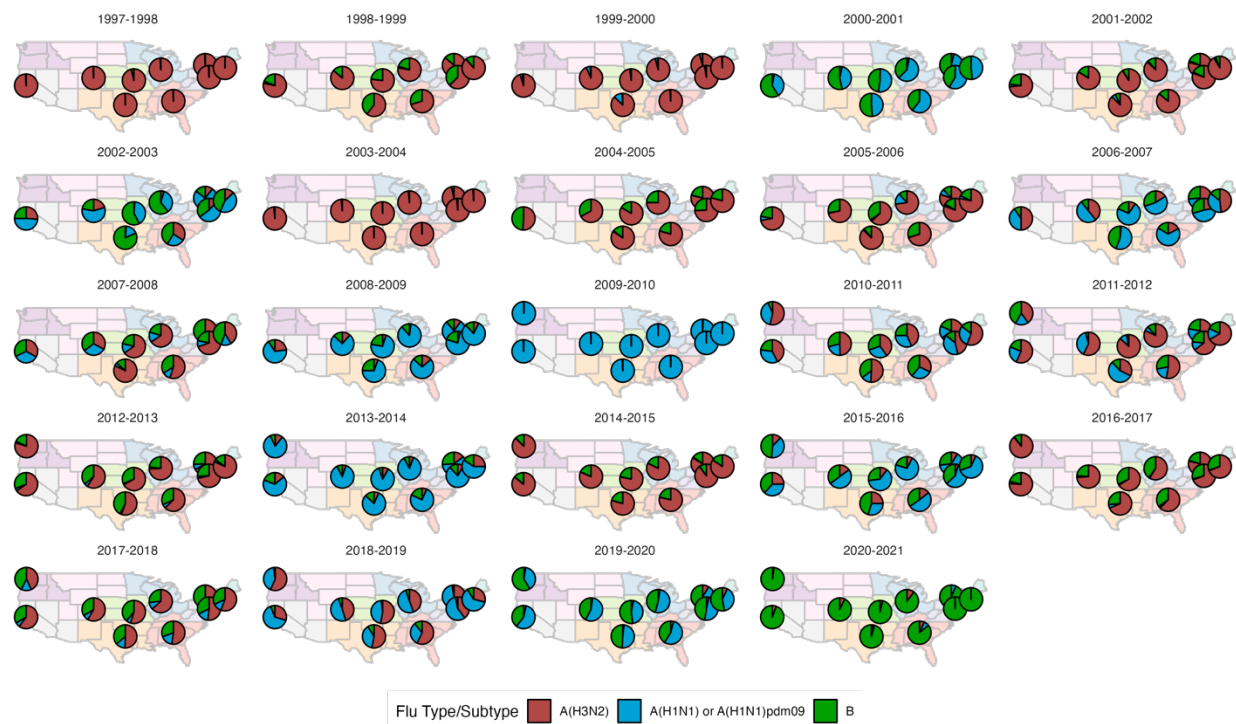

1635

1636

1637

1638

1639

**Figure S10. Regional patterns of influenza type and subtype incidence from seasons 1997-1998 to 2018-2019.** Pie charts represent the proportion of influenza positive samples that were typed as A(H3N2), A(H1N1) or A(H1N1)pdm09, and B in each HHS region. Data for Region 10 (purple) were not available in seasons prior to the 2009 A(H1N1) pandemic.

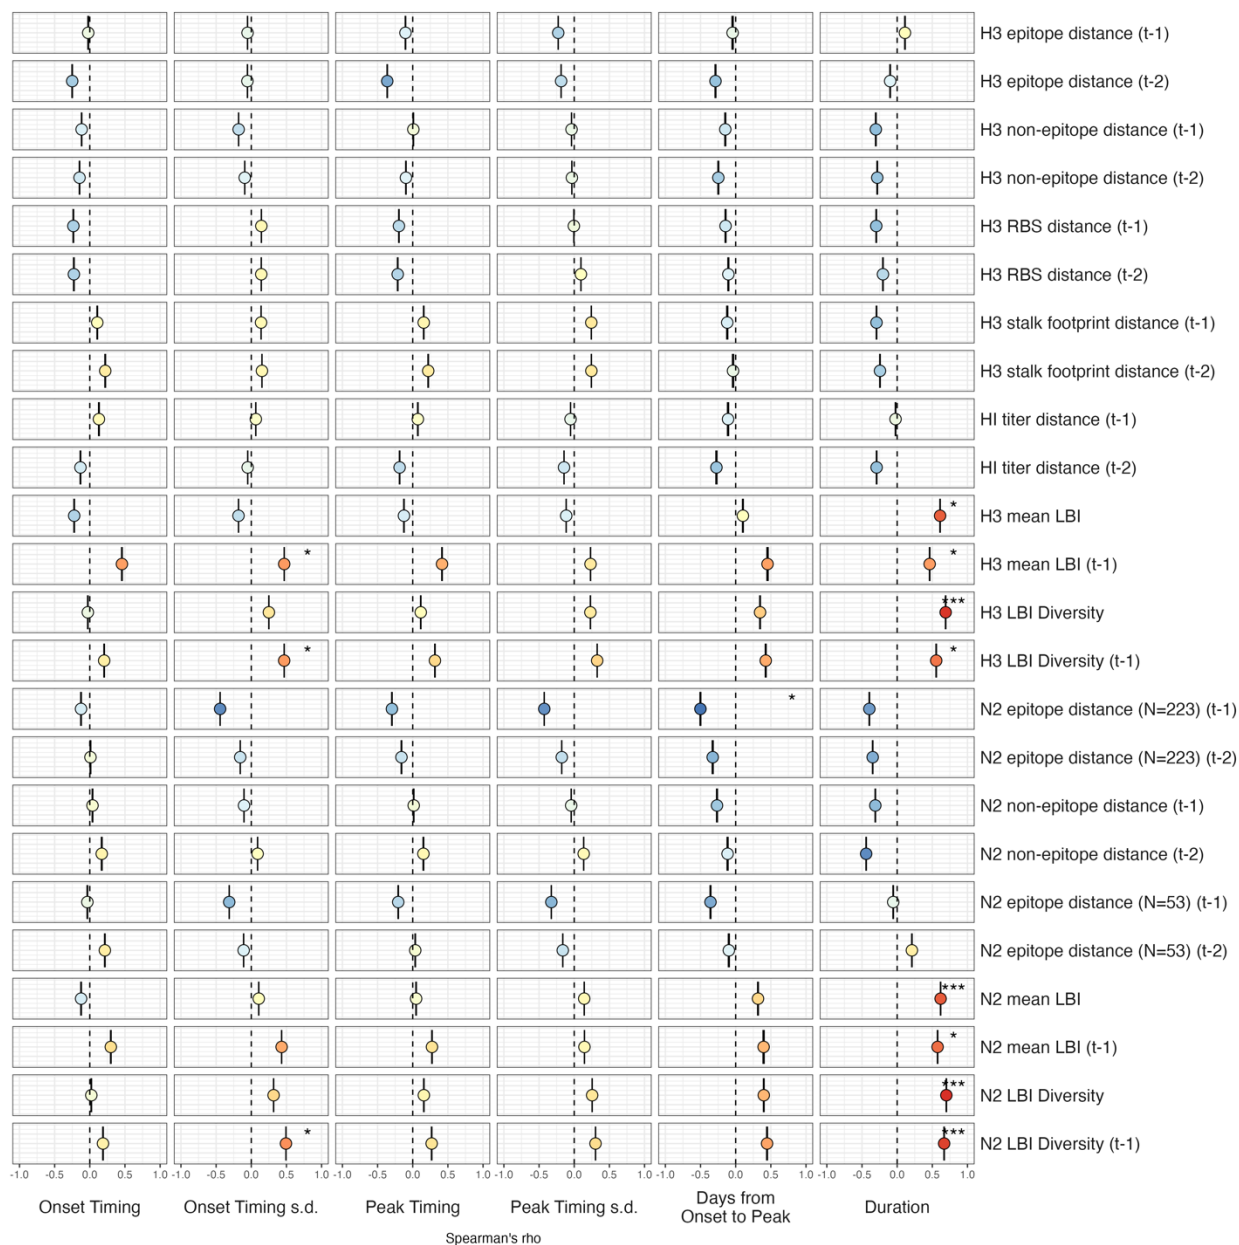

1640

1641 **Figure S11. Univariate correlations between A(H3N2) viral fitness and epidemic timing.** Mean  
 1642 Spearman correlation coefficients, 95% confidence intervals of correlation coefficients, and corresponding  
 1643 p-values of bootstrapped (N = 1000) viral fitness indicators (columns) and epidemic timing metrics.  
 1644 Epidemic timing metrics are the week of epidemic onset, regional variation (s.d.) in onset timing, the week  
 1645 of epidemic peak, regional variation (s.d.) in peak timing, the number of days between epidemic onset  
 1646 and peak, and seasonal duration. Color indicates the strength and direction of the association, from dark  
 1647 red (strong positive correlation) to dark blue (strong negative correlation), and stars indicate statistical  
 1648 significance (\* P < 0.05, \*\* P < 0.01, \*\*\* P < 0.001). Abbreviations: HI = hemagglutination inhibition, RBS:  
 1649 receptor binding site, t - 1 = one-season lag, t - 2 = two-season lag, LBI = local branching index.

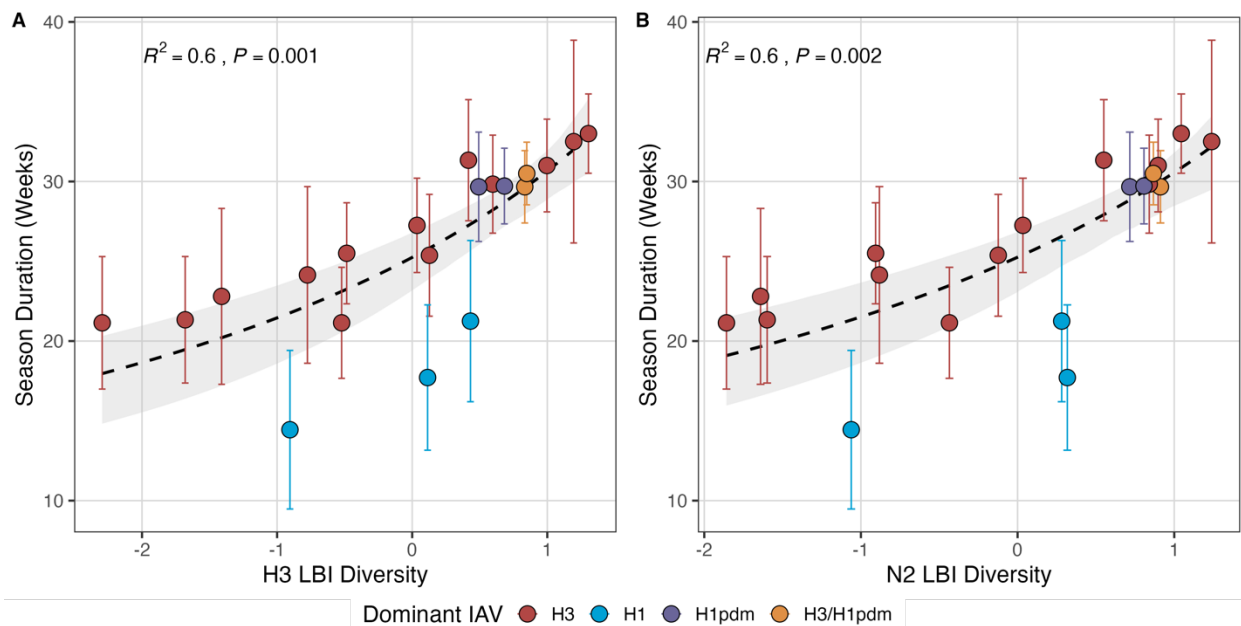

1650  
 1651 **Figure S12. Seasonal duration increases with diversity in clade growth rates of circulating H3 and**  
 1652 **N2 lineages, measured as the Shannon entropy of local branching index (LBI) values. A.** H3 LBI  
 1653 diversity and **B.** N2 LBI diversity during the current season positively correlate with seasonal duration. LBI  
 1654 values are scaled to aid in direct comparisons of H3 and N2 LBI diversity. Point color indicates the  
 1655 dominant influenza A subtype based on CDC influenza season summary reports (red: A(H3N2), blue:  
 1656 A(H1N1), purple: A(H1N1)pdm09, orange: A(H3N2)/A(H1N1)pdm09 co-dominant). Mean values of  
 1657 regional season duration were fit as a function of H3 LBI diversity or N2 LBI diversity using Gaussian  
 1658 GLMs (inverse link) with 1000 bootstrap resamples.

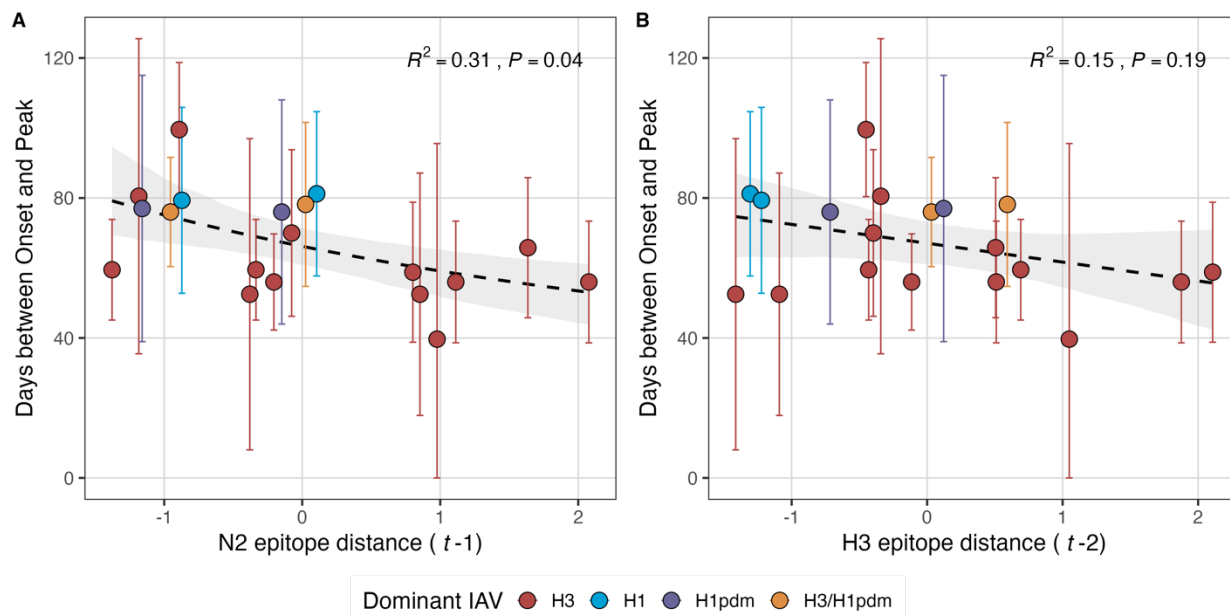

1659  
 1660 **Figure S13. Epidemic speed increases with N2 antigenic drift.** N2 epitope distance correlates with  
 1661 fewer days from epidemic onset to peak (A), while the relationship between H3 epitope distance and  
 1662 epidemic speed is less apparent (B). Seasonal epitope distance is the mean distance between strains  
 1663 circulating in season  $t$  and those circulating in the prior season ( $t - 1$ ) or two seasons ago ( $t - 2$ ).  
 1664 Distances are scaled to aid in direct comparison of evolutionary indicators. Point color indicates the  
 1665 dominant influenza A subtype based on CDC influenza season summary reports (red: A(H3N2), blue:  
 1666 A(H1N1), purple: A(H1N1)pdm09, orange: A(H3N2)/A(H1N1)pdm09 co-dominant). Mean values of  
 1667 regional days from onset to peak were fit as a function of H3 or N2 epitope distance using Gamma GLMs  
 1668 (inverse link) with 1000 bootstrap resamples.

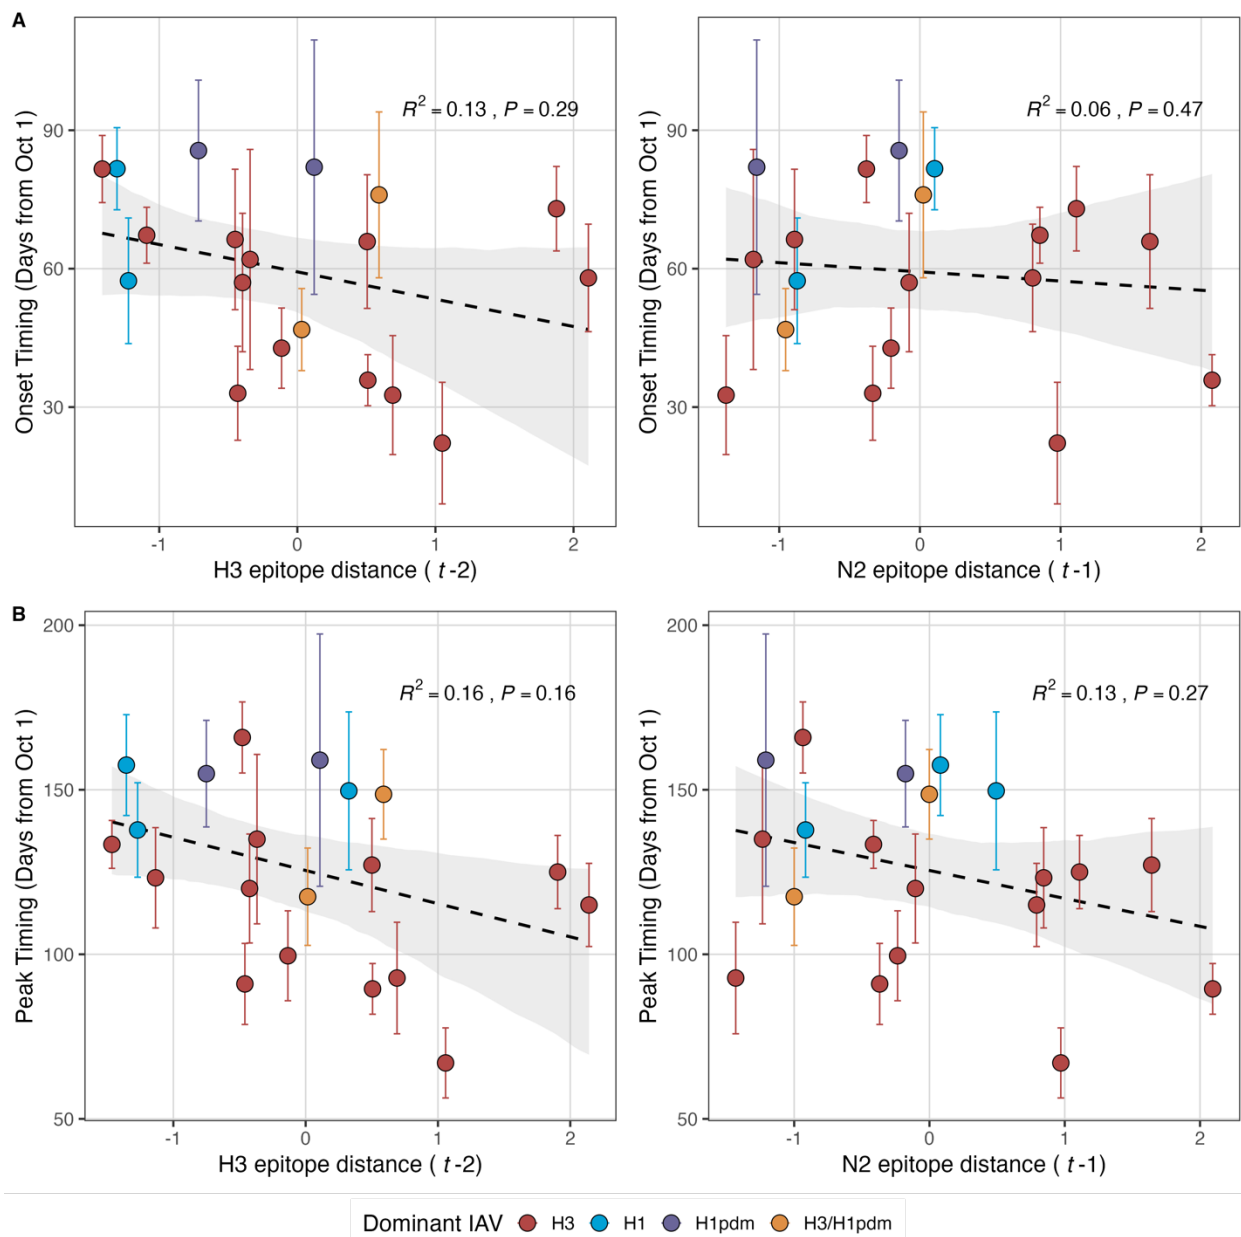

1669  
 1670 **Figure S14. The timing of epidemic onsets and peaks are weakly correlated with H3 and N2**  
 1671 **antigenic change. A.** Epidemic onsets are earlier in seasons with increased H3 epitope distance ( $t-2$ ),  
 1672 but the correlation is not statistically significant. **B.** Epidemic peaks are earlier in seasons with increased  
 1673 H3 epitope distance ( $t-2$ ) or increased N2 epitope distance ( $t-1$ ), but correlations are not statistically  
 1674 significant. Seasonal epitope distance is the mean distance between strains circulating in season  $t$   
 1675 and those circulating in the prior season ( $t-1$ ) or two seasons ago ( $t-2$ ). Distances are scaled to aid in  
 1676 direct comparison of evolutionary indicators. Point color indicates the dominant influenza A subtype  
 1677 based on CDC influenza season summary reports (red: A(H3N2), blue: A(H1N1), purple: A(H1N1)pdm09,  
 1678 orange: A(H3N2)/A(H1N1)pdm09 co-dominant). Mean values of regional epidemic onsets and peaks  
 1679 were fit as a function of H3 or N2 epitope distance using LMs with 1000 bootstrap resamples.



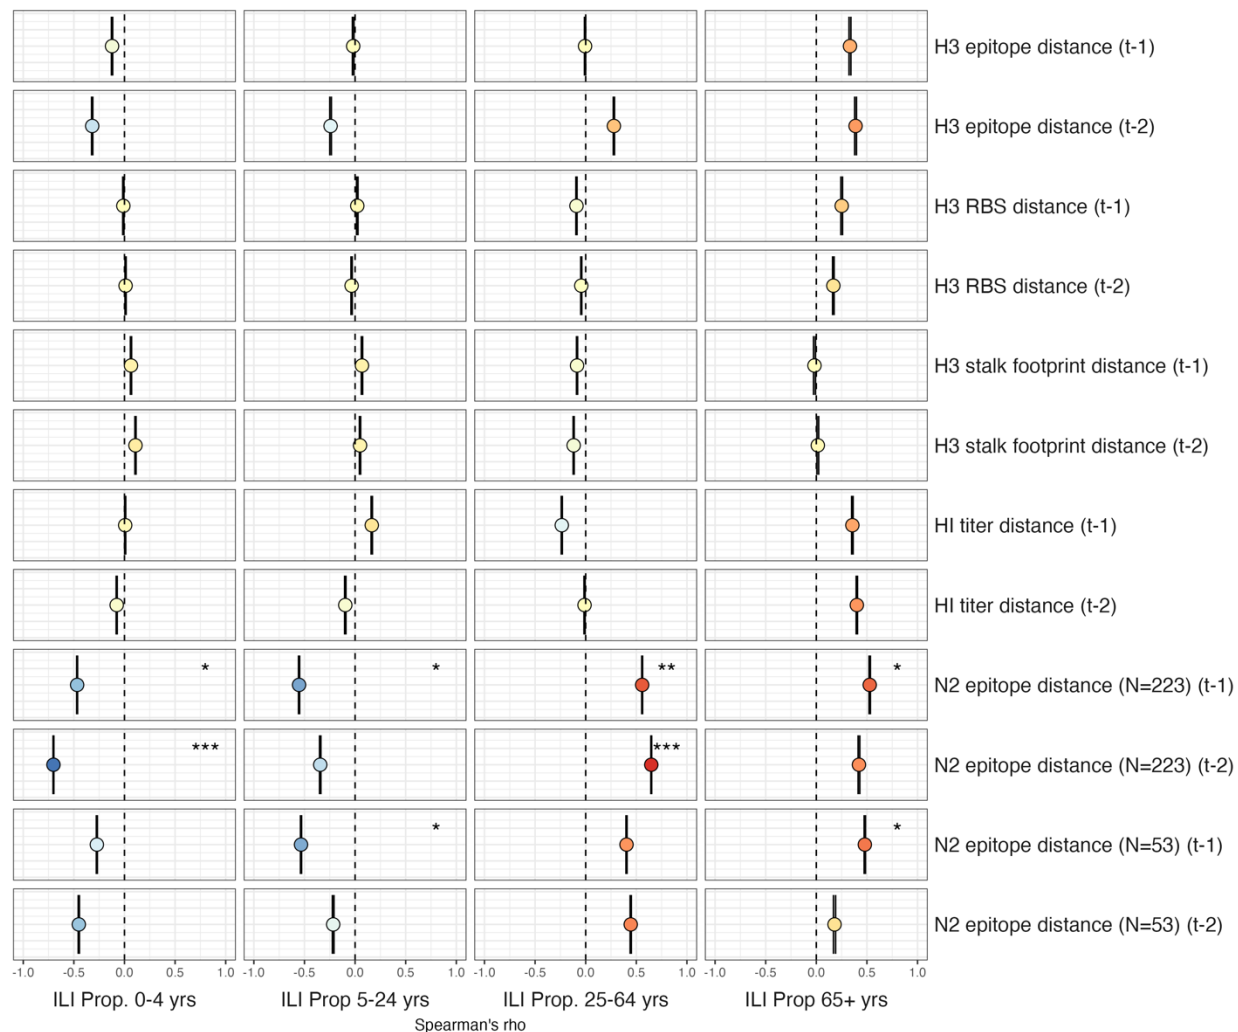

1680  
 1681 **Figure S15. Univariate correlations between A(H3N2) antigenic change and the age distribution of**  
 1682 **outpatient influenza-like illness (ILI) cases.** Mean Spearman correlation coefficients, 95% confidence  
 1683 intervals of correlation coefficients, and corresponding p-values of bootstrapped (N = 1000) evolutionary  
 1684 indicators (rows) and the proportion of ILI cases in individuals aged < 5 years, 5-24 years,  
 1685 and ≥ 65 years (columns). Color indicates the strength and direction of the association, from dark red  
 1686 (strong positive correlation) to dark blue (strong negative correlation), and stars indicate statistical  
 1687 significance (\* P < 0.05, \*\* P < 0.01, \*\*\* P < 0.001). Abbreviations: HI = hemagglutination inhibition, RBS:  
 1688 receptor binding site, t - 1 = one-season lag, t - 2 = two-season lag.

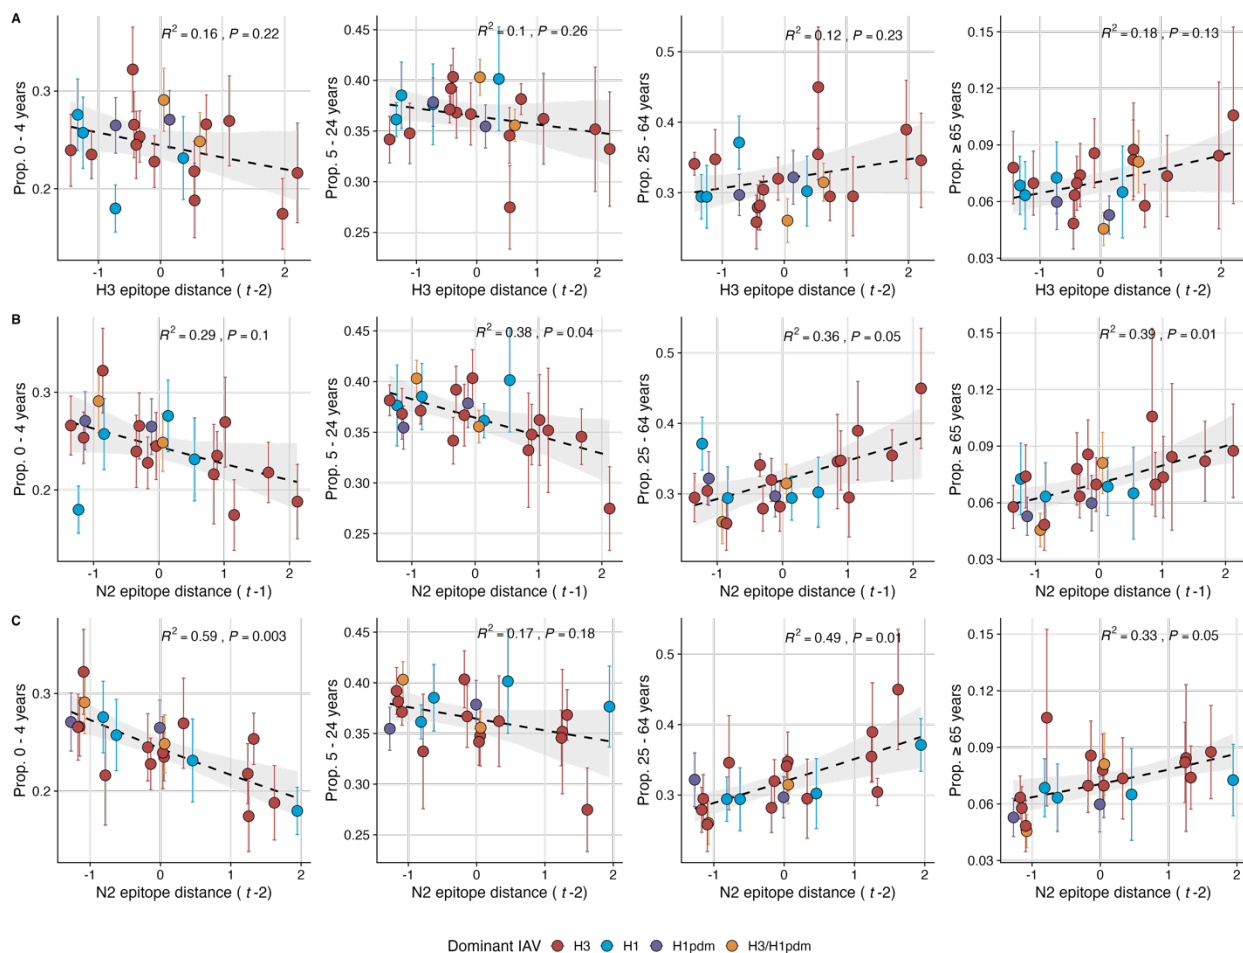

1689  
 1690  
 1691 **Figure S16. N2 epitope distance correlates with the age distribution of outpatient influenza-like**  
 1692 **illness (ILI) cases.** Seasonal epitope distance is the mean distance between strains circulating in season  
 1693  $t$  and those circulating in the prior season ( $t-1$ ) or two seasons ago ( $t-2$ ). Distances are scaled to aid in  
 1694 direct comparison of evolutionary indicators. Point color indicates the dominant influenza A subtype  
 1695 based on CDC influenza season summary reports (red: A(H3N2), blue: A(H1N1), purple: A(H1N1)pdm09,  
 1696 orange: A(H3N2)/A(H1N1)pdm09 co-dominant), and vertical bars are 95% confidence intervals of  
 1697 regional age distribution estimates. The fraction of cases in each age group were fit as a function of  
 seasonal H3 or N2 epitope distance using Beta GLMs (logit link) with 1000 bootstrap resamples.

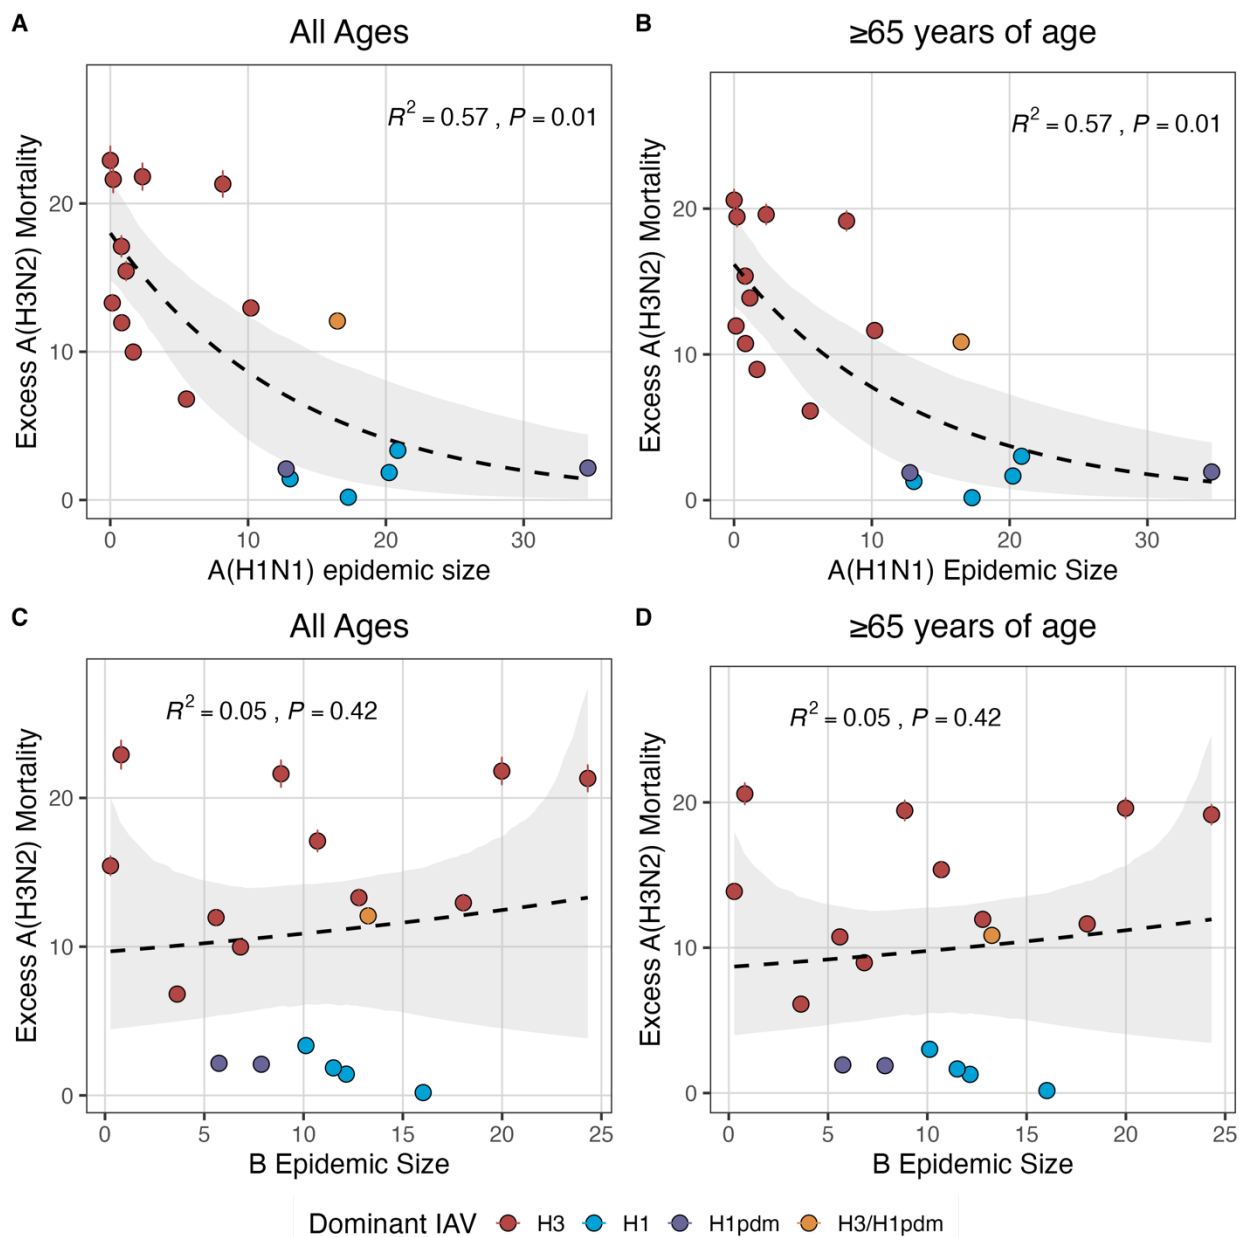

1698  
 1699 **Figure S17. National excess influenza A(H3N2) mortality decreases with A(H1N1) epidemic size**  
 1700 **but not B epidemic size.** Excess influenza deaths attributable to A(H3N2) (per 100,000 people) were  
 1701 estimated from a seasonal regression model fit to weekly pneumonia and influenza-coded deaths. Point  
 1702 color indicates the dominant influenza A subtype based on CDC influenza season summary reports (red:  
 1703 A(H3N2), blue: A(H1N1), purple: A(H1N1)pdm09, orange: A(H3N2)/A(H1N1)pdm09 co-dominant), and  
 1704 vertical bands are 95% confidence intervals of model estimates. National excess mortality estimates were  
 1705 fit as a function of seasonal A(H1N1) or B epidemic size using Gaussian GLMs (log link) with 1000  
 1706 bootstrap resamples.

All seasons

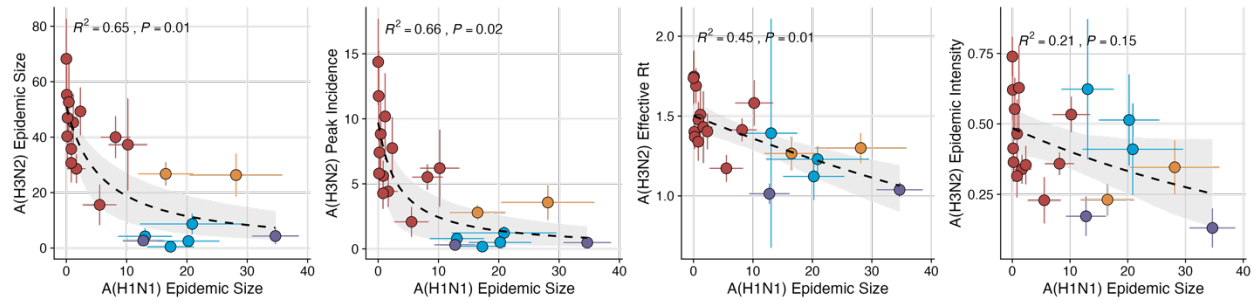

Pre-2009 seasons

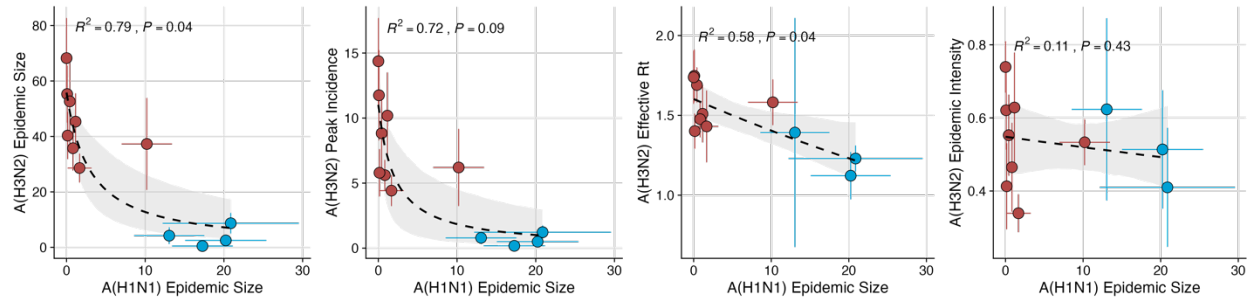

Post-2009 seasons

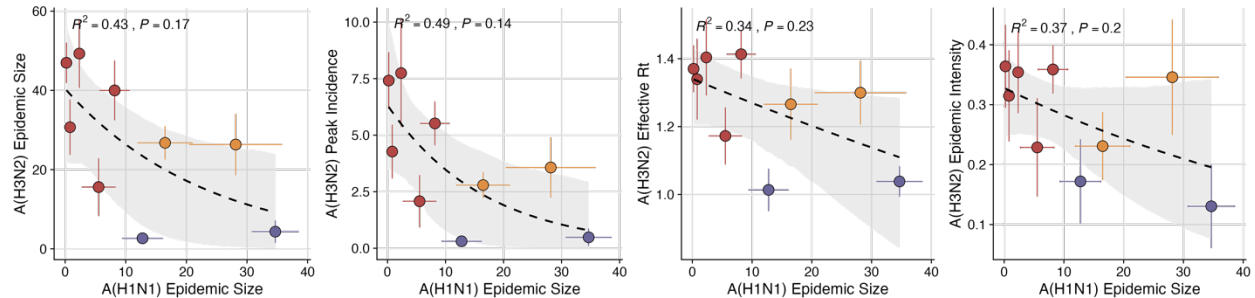

Dominant IAV ● H3 ● H1 ● H1pdm ● H3/H1pdm

1707  
 1708 **Figure S18. The effect of influenza A(H1N1) epidemic size on A(H3N2) epidemic burden during the**  
 1709 **entire study period (1997-2019) (top), pre-2009 seasons (middle), and post-2009 seasons (bottom).**  
 1710 Influenza A(H1N1) epidemic size inversely correlates with A(H3N2) epidemic size, peak incidence,  
 1711 transmissibility (maximum effective reproduction number, Rt), and epidemic intensity. Point color indicates  
 1712 the dominant influenza A virus (IAV) subtype based on CDC influenza season summary reports (red:  
 1713 A(H3N2), blue: A(H1N1), purple: A(H1N1)pdm09, orange: A(H3N2)/A(H1N1)pdm09 co-dominant), and  
 1714 vertical and horizontal bands are 95% confidence intervals of regional estimates. Seasonal mean  
 1715 A(H3N2) epidemic metrics were fit as a function of mean A(H1N1) epidemic size using Gaussian GLMs  
 1716 (epidemic size, peak incidence: inverse link; effective Rt: log link) or Beta GLMs (epidemic intensity: logit  
 1717 link) with 1000 bootstrap resamples.

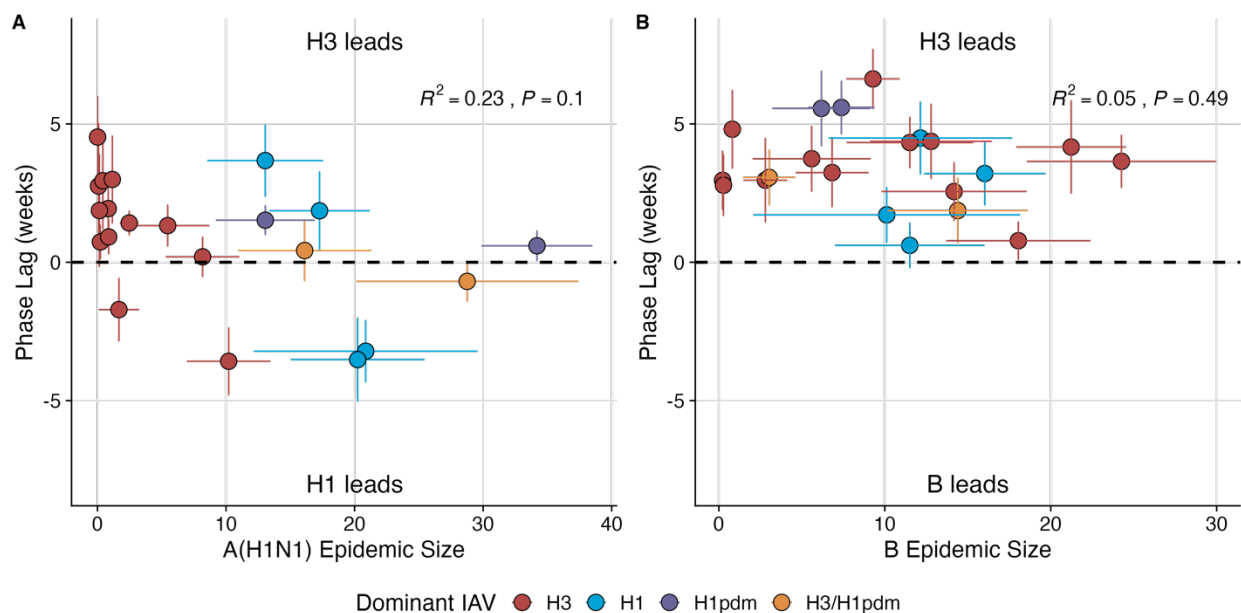

1718

1719 **Figure S19. Wavelet analysis of influenza A and B epidemic timing.** **A.** A(H3N2) incidence precedes

1720 A(H1N1) incidence in most seasons. Although A(H1N1) incidence sometimes leads or is in phase with

1721 A(H3N2) incidence (negative or zero phase lag), the direction of seasonal phase lags is not clearly

1722 associated with A(H1N1) epidemic size. **B.** A(H3N2) incidence leads B incidence (positive phase lag)

1723 during each season, irrespective of B epidemic size. Point color indicates the dominant influenza A

1724 subtype based on CDC influenza season summary reports (red: A(H3N2), blue: A(H1N1), purple:

1725 A(H1N1)pdm09, orange: A(H3N2)/A(H1N1)pdm09 co-dominant), and vertical bars are 95% confidence

1726 intervals of regional estimates. To estimate the relative timing of influenza subtype incidences, phase

1727 angle differences were calculated as phase in A(H3N2) minus phase in A(H1N1) (or B), with a positive

1728 value indicating that A(H1N1) (or B) incidence lags A(H3N2) incidence. To calculate seasonal phase lags,

1729 we averaged pairwise phase angle differences from epidemic week 40 to epidemic week 20. Seasonal

1730 phase lags were fit as a function of seasonal A(H1N1) or B epidemic size using LMs with 1000 bootstrap

1731 resamples.

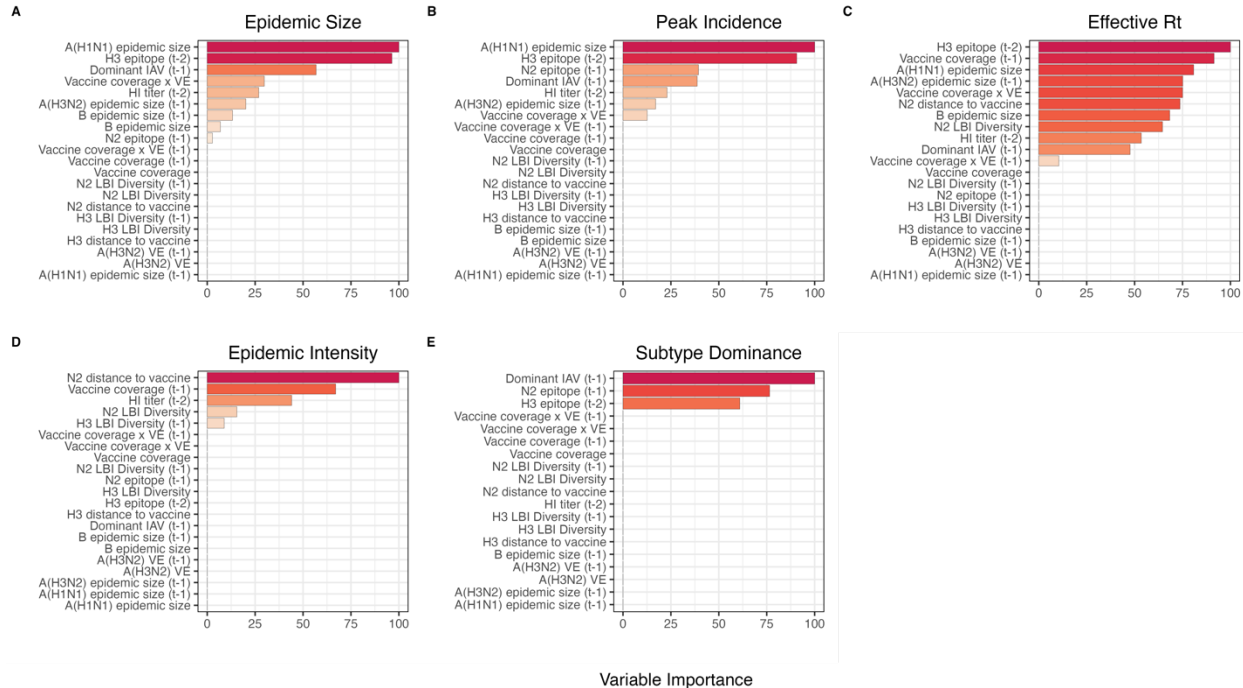

1732  
1733  
1734  
1735  
1736  
1737  
1738  
1739  
1740  
1741

**Figure S20. Variable importance rankings from LASSO models predicting A(H3N2) epidemic dynamics.** Ranking of variables in predicting seasonal A(H3N2) **A.** epidemic size, **B.** peak incidence, **C.** transmissibility (effective reproduction number,  $R_t$ ), **D.** epidemic intensity (inverse Shannon entropy), and **E.** subtype dominance. Models were tuned using a repeated leave-one-season-out cross-validated sample of the data. Variables are ranked by their coefficient estimates, with differences in prediction accuracy scaled by the total (null model) error. Abbreviations: HI titer = hemagglutination inhibition  $\log_2$  titer distance, t - 1 = one-season lag, t - 2 = two-season lag, LBI = local branching index, peak = peak incidence, distance to vaccine = epitope distance between currently circulating strains and the recommended vaccine strain, VE = vaccine effectiveness.

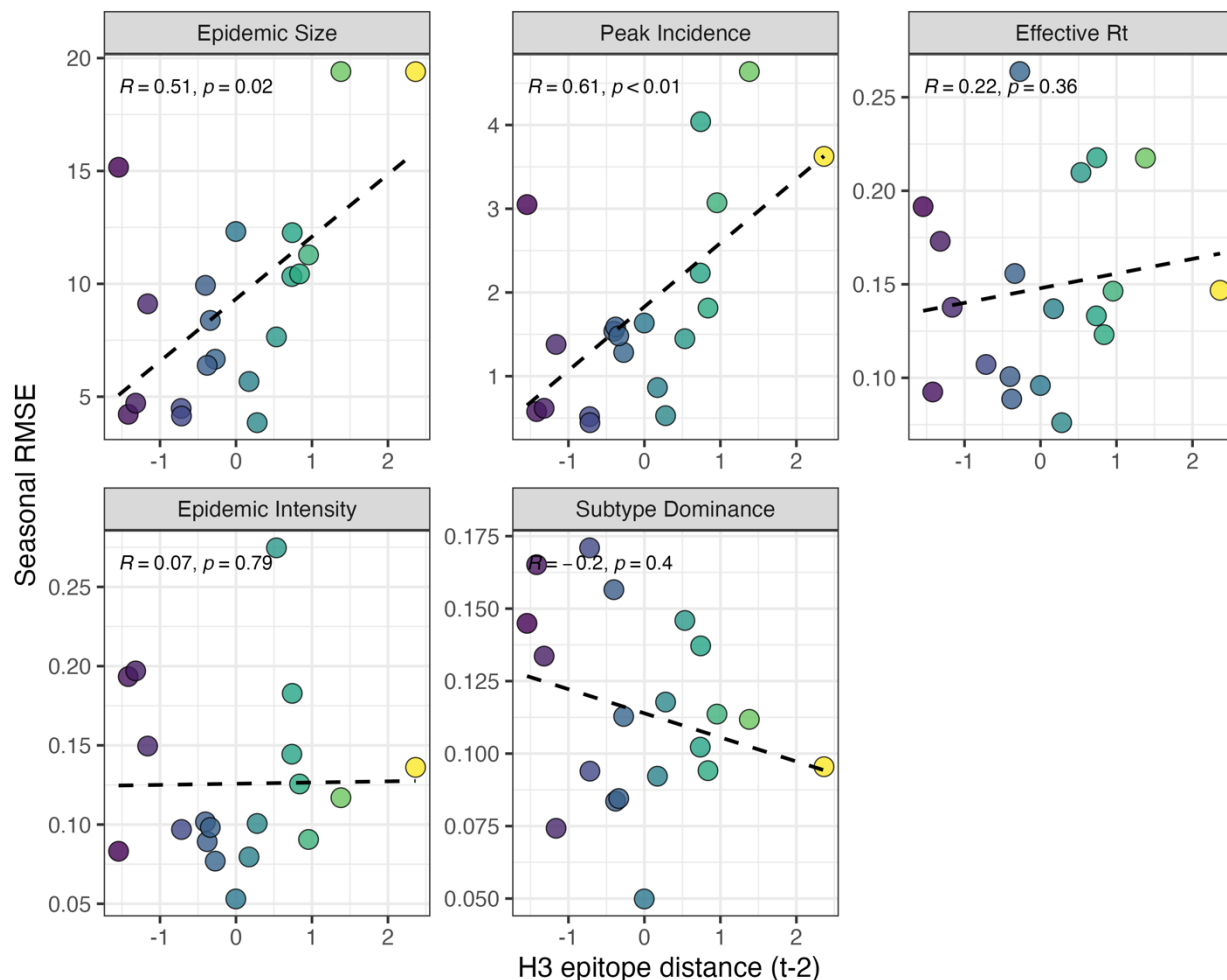

1742  
1743 **Figures S21. Relationships between the predictive accuracy of random forest models and H3**  
1744 **epitope distance.** Root mean squared errors between observed and model-predicted values were  
1745 averaged across regions for each season, and results are faceted according to epidemic metric. Point  
1746 color corresponds to the degree of H3 epitope distance in viruses circulating in season  $t$  relative to those  
1747 circulating two seasons ago ( $t - 2$ ), with bright yellow points indicating seasons with greater antigenic  
1748 novelty. Spearman correlation coefficients and associated P-values are provided in the top left section of  
1749 each facet.

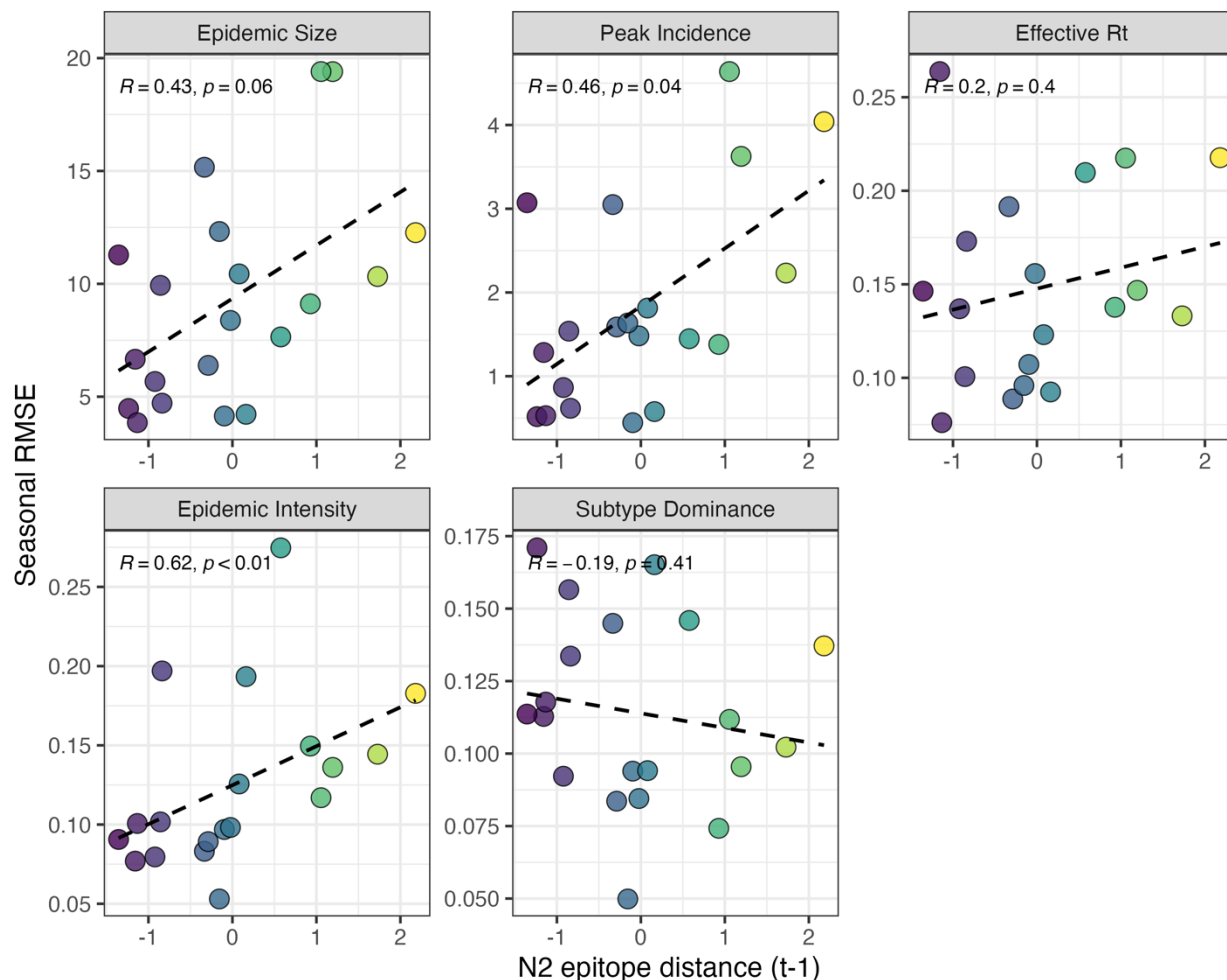

1750  
 1751 **Figures S22. Relationships between the predictive accuracy of random forest models and N2**  
 1752 **epitope distance** Root mean squared errors between observed and model-predicted values were  
 1753 averaged across regions for each season, and results are faceted according to epidemic metric. Point  
 1754 color corresponds to the degree of N2 epitope distance in viruses circulating in season  $t$  relative to those  
 1755 circulating in the prior season ( $t - 1$ ), with bright yellow points indicating seasons with greater antigenic  
 1756 novelty. Spearman correlation coefficients and associated P-values are provided in the top left section of  
 1757 each facet.
